# Supplementary material
Source: publisher figshare collection journal article supplement (https://acs.figshare.com/ndownloader/files/3852343)
Supplement: Supplementary file 1 [file 3852343]

Supporting Information

# Gate-Tunable Resonant Tunneling in Double Bilayer Graphene Heterostructures

*Babak Fallahazad<sup>‡</sup>, Kayoung Lee<sup>‡</sup>, Sangwoo Kang<sup>‡</sup>, Jiamin Xue, Stefano Larentis, Christopher Corbet, Kyoungwan Kim, Hema C. P. Movva, Takashi Taniguchi <sup>a)</sup>, Kenji Watanabe <sup>a)</sup>, Leonard F. Register, Sanjay K. Banerjee, Emanuel Tutuc\**

Microelectronics Research Center, Department of Electrical and Computer Engineering,

The University of Texas at Austin, Austin, TX 78758, USA

a) National Institute for Materials Science, 1-1 Namiki Tsukuba Ibaraki 305-0044, Japan

**Corresponding author**

Email: [etutuc@mer.utexas.edu](mailto:etutuc@mer.utexas.edu)

## Device fabrication

The fabrication starts with exfoliation of hBN on a silicon wafer covered with 285 nm-thick thermally grown  $\text{SiO}_2$ . Topography and thickness of the exfoliated hBN flakes are measured with atomic force microscopy (AFM), and flakes with minimum surface roughness and surface contamination are selected. On a separate silicon wafer covered with water soluble Polyvinyl Alcohol (PVA) and Poly(Methyl Methacrylate) (PMMA), bilayer graphene is mechanically exfoliated from natural graphite and identified using optical contrast and Raman spectroscopy. The PVA is dissolved in water, and the PMMA/bilayer graphene stack is transferred onto hBN flake using a thin glass slide. The PMMA film is then dissolved in acetone and the bilayer graphene is trimmed using EBL and  $\text{O}_2$  plasma etching. Similarly, a thin hBN ( $t_{\text{hBN}} = 1.2\text{-}1.8$  nm) flake exfoliated on a PMMA/PVA/Si substrate is transferred onto the existing bilayer graphene. A second bilayer graphene is transferred onto the stack, and trimmed on top of the bottom bilayer graphene using EBL and  $\text{O}_2$  plasma etching. Finally, metal contacts to both top and bottom bilayer graphene are defined through EBL, electron-beam evaporation of Ni and Au, and lift-off.

Device #2 is fabricated using the dry transfer method described in ref. [S1]. The device fabrication starts with mechanical exfoliation of bilayer graphene and hBN on  $\text{SiO}_2/\text{Si}$  substrate. Then, we spin coat poly-propylene carbonate (PPC) on a 1 mm-thick Polydimethylsiloxane (PDMS) film bonded to a thin glass slide. The glass/PDMS/PPC stack is used to pick up the top bilayer graphene, the thin interlayer hBN ( $t_{\text{hBN}} = 1.2$  nm), and the bottom bilayer graphene consecutively from  $\text{SiO}_2/\text{Si}$  substrates using the Van der Waals force between the two-dimensional crystals. The entire stack is transferred onto an hBN flake previously exfoliated on  $\text{SiO}_2/\text{Si}$  substrate. Figure 1(b) shows the transferred stack on top of bottom hBN/ $\text{SiO}_2/\text{Si}$

substrate. After dissolving the PPC, a sequence of EBL, O<sub>2</sub> and CHF<sub>3</sub> plasma etching is used to define the active area. Finally, the metal contacts are defined by EBL, e-beam evaporation of Ti-Au, and lift-off.

### Transverse electric field across the individual bilayers

The momentum-conserving tunneling between two bilayer graphene depends on their energy-momentum dispersion, and density of states. The band structure of bilayer graphene, particularly close to the CNP, can be tuned by an applied transverse electric ( $E$ ) field, as a result of the applied  $V_{BG}$  and  $V_{TL}$ . It is therefore instructive to examine the  $E$ -field value for the two bilayers in a double bilayer graphene heterostructure. The general expressions for transverse  $E$ -field across the top ( $E_T$ ) and bottom ( $E_B$ ) bilayers in a double bilayer graphene device are:

$$E_B = \frac{en_B}{2\varepsilon_0} + \frac{en_T}{\varepsilon_0} + E_{B0} \quad (S1)$$

$$E_T = \frac{en_T}{2\varepsilon_0} + E_{T0} \quad (S2)$$

Here  $n_T$  and  $n_B$  are the top and bottom layer densities, respectively, and  $\varepsilon_0$  is the vacuum permittivity.  $E_{T0}$  and  $E_{B0}$  are the transverse  $E$ -fields across the top and bottom bilayer at the DNP, as a result of unintentional layer doping. At a given  $V_{BG}$  and  $V_{TL}$ , the  $n_B$  and  $n_T$  values can be calculated from eqs. 1 and 2. The  $E_{B0}$  value can be calculated as following. We first determine  $E_B = 0$  point, marked by minimum  $\rho_B$  along the CNL of the bottom bilayer resistivity contour plot (Fig. S1a). At  $E_B = 0$ , eq. 1 and S1 yield:

$$E_{B0} = \frac{C_{BG}\Delta V_{BG}}{\varepsilon_0} \quad (S3)$$

Here  $\Delta V_{BG} = V_{BG-DNP} - V_{BG-E_B=0}$ .

Finding the value of the  $E_{T0}$  in a back-gated double bilayer device requires an assumption about the dopant position that cause the device DNP to shift from  $V_{BG} = V_{TL} = 0$  V. To

calculate the  $E_{T0}$  in our devices assume the dopants are placed on the top bilayer graphene, an assumption most plausible when the top bilayer is uncapped, as in Device #1. Equation 1 combined with the Gauss law yield:

$$E_{T0} = \frac{C_{BG} V_{BG-DNP}}{\epsilon_0}$$

Figures S1b and S1c show the calculated  $E_T$  and  $E_B$  in Device #1 and #2 along the locus of aligned neutrality points in the two bilayers, i.e. at the tunneling resonance, as a function of  $V_{BG}$ . At the tunneling resonance  $E_B$  shows a linear dependence on  $V_{BG}$ , while  $E_T$  remains constant. For Device #1, the condition  $E_T = E_B$ , desirable for identical energy-momentum dispersion in the two bilayers occurs at  $V_{BG} = 24$  V, and a finite  $E$ -field. For Device #2,  $E_T = E_B$  closer to zero, and at  $V_{BG} = -7$  V. Figures 4a and S1b data combined suggest the tunneling resonance in Device #1 is strongest in the vicinity of the  $E_T = E_B$  point, where the band structures are closely similar for both top and bottom bilayers. The tunneling resonance in Device #2 occurs over a wider range of  $V_{BG}$  where the difference between the  $E_T$  and  $E_B$  can be as large as 0.34 V/nm.

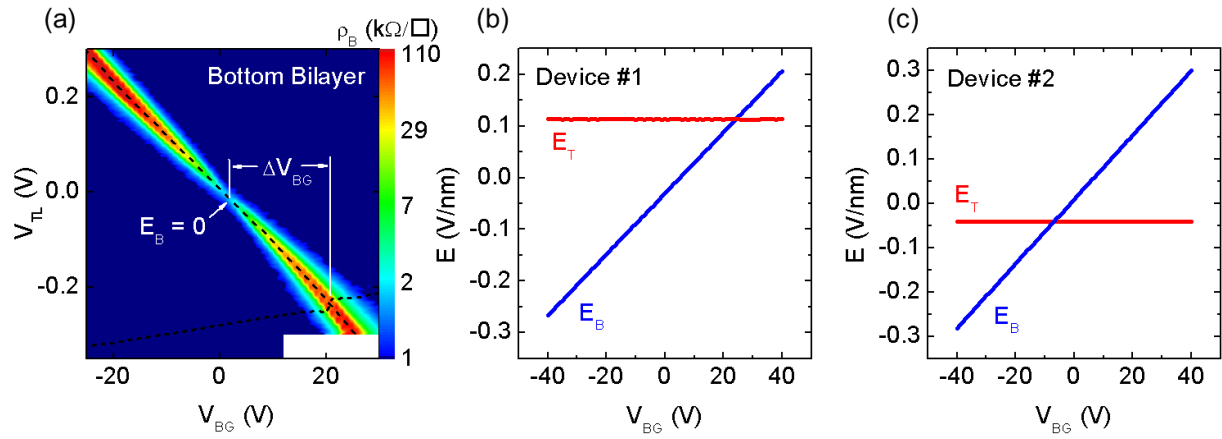

**Figure S1. Transverse  $E$ -fields across the top and bottom bilayers.** (a) Device #1  $\rho_B$  contour plot vs.  $V_{BG}$  and  $V_{TL}$ , measured at  $T = 1.4$  K. The CNL of the top bilayer graphene is added to

mark the DNP.  $E_T$  and  $E_B$  in (b) Device #1, and (c) Device #2, calculated at the tunneling resonance.

## References

(S1) Wang, L.; Meric, I.; Huang, P. Y.; Gao, Q.; Gao, Y.; Tran, H.; Taniguchi, T.; Watanabe, K.; Campos, L. M.; Muller, D. A.; Guo, J. ; Kim, P.; Hone, J.; Shepard, K. L.; Dean, C. R. *Science*, **2013**, 342, 614.
